# Supplementary material
Source: Springer Nature journal article supplement (https://www.springermedizin.de/resource/supplementary/12916_2013_1080_MOESM3_ESM.pdf/9598846)
Supplement: MOESM3 [file 9598846]

**Literature search:**

**Databases:** PubMed, ISI web of knowledge and SCOPUS

**Meeting abstracts:** ICAAC, ECCMID, congress of the Asian Pacific Society of Respirology, Chest, British Thoracic Society winter meeting, Southern Regional meeting

Search results combined = 49,405

Articles screened on basis of tittle and abstract

**Excluded:**

Duplicates - 15,311

Non-humans - 118

Pediatrics - 3,496

HIV - 5,966

Gynaecology and obstetrics (including  
STD) - 1,866

Vaccines - 1,210

Infection prevention and control - 3,377

Hospital-acquired - 2,163

Non-related infections - 6,051

Non-related subjects - 9,581

Included - 266

Manuscript review and application of  
inclusion criteria

**Excluded:**

Review, opinion (letter,editorial) - 106

Not meeting inclusion critera - 117

**Included:**

43 studies
